# Supplementary material for: Engineering effective structural defects of metal–organic frameworks to enhance their catalytic performances
Source: Royal Society of Chemistry journal article supplement (doi:10.1039/c9ta12230c), 2020-01-01
Supplement: c9ta12230c1.pdf [file c9ta12230c1.pdf]

**Electronic Supplementary Information**

**Engineering effective structural defects of metal-organic frameworks to enhance their catalytic performances**

Jianjian Wang,<sup>1,2\*</sup> Lingmei Liu,<sup>3</sup> Cailing Chen,<sup>3</sup> Xinglong Dong,<sup>3</sup> Qin Wang,<sup>1,2</sup> Lujain Alfilfil,<sup>3</sup> Mohammed R. AlAlouni,<sup>3</sup> Kexin Yao,<sup>1,2</sup> Jianfeng Huang,<sup>1,2</sup> Daliang Zhang<sup>1,2</sup> and Yu Han<sup>3</sup>

<sup>1</sup> Multi-scale Porous Materials Center, Institute of Advanced Interdisciplinary Studies, Chongqing University, Chongqing 400045, China

<sup>2</sup> School of Chemistry and Chemical Engineering, Chongqing University, Chongqing 401331, China

<sup>3</sup> Advanced Membranes and Porous Materials Center, King Abdullah University of Science and Technology (KAUST), Thuwal 23955-6900, Saudi Arabia

\* Corresponding author. Email: [wangjianjian@cqu.edu.cn](mailto:wangjianjian@cqu.edu.cn)

1

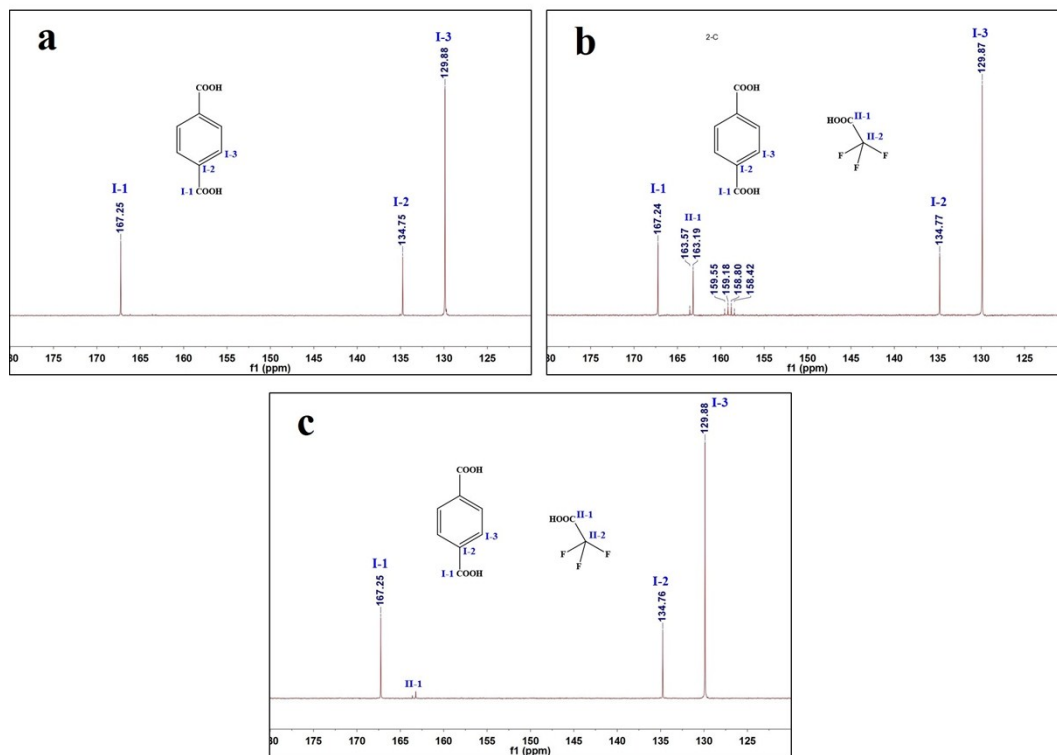

2

**Fig. S1**  $^{13}\text{C}$  NMR spectra of acid-digested (a) UiO-66-DF, (b) UiO-66(1d), and (c) UiO-66(1d)-H2 samples. Note: 100 mg of UiO-66 sample was digested by a mixture of 47 wt.% HF (80  $\mu\text{L}$ ) and 1 mL of  $d_6$ -DMSO. After centrifugation, the upper clear solution was transferred into a NMR tube and analyzed on a Bruker 600 MHz spectrometer (Ultrashield 600 PLUS).

7

1

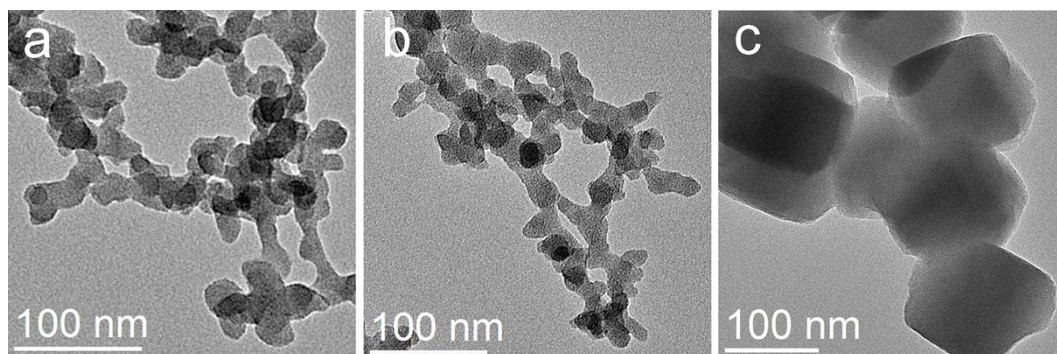

2

3 **Fig. S2** Low-magnitude transmission electron microscopy (TEM) images of (a) UiO-66(1d), (b) UiO-  
4 66(3d), and (c) UiO-66-DF.

5

1

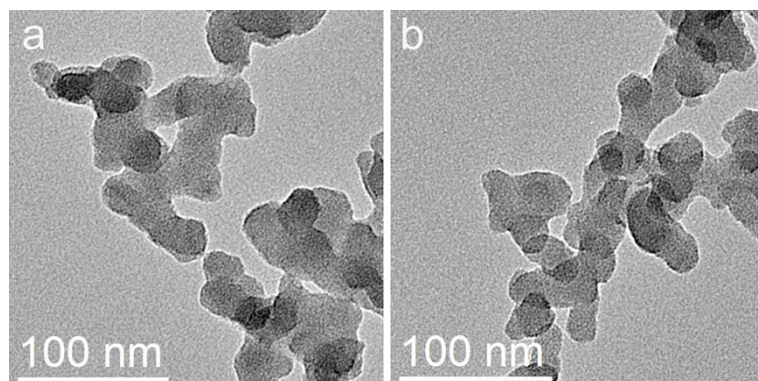

2

3 **Fig. S3** Low-magnitude TEM images of (a) UiO-66(1d)-H1 and (b) UiO-66(1d)-H2.

4

1

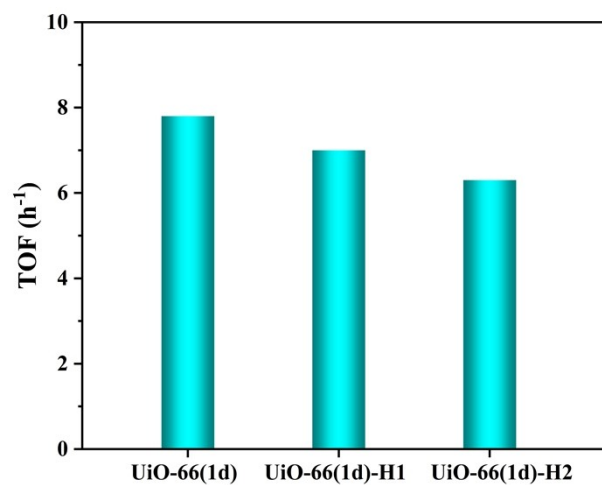

2

3 **Fig. S4** Turnover frequency (TOF) for UiO-66(1d), UiO-66(1d)-H1, and UiO-66(1d)-H2, where TOF was  
4 calculated based on the number of converted cyclohexanone per open metal site per reaction time and the  
5 number of open metal site was considered equal to the amount of TFA modulator in defective UiO-66.

1

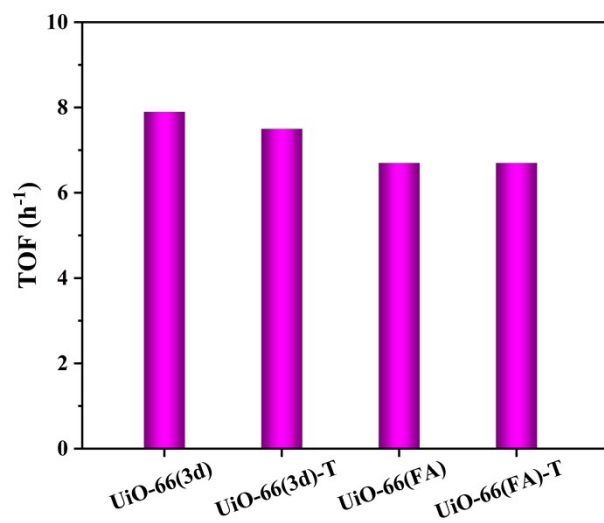

2

3 **Fig. S5** Turnover frequency (TOF) for UiO-66(3d), UiO-66(3d)-T, UiO-66(FA), and UiO-66(FA)-T, where  
4 TOF was calculated based on the number of converted cyclohexanone per open metal site per reaction time  
5 and the number of open metal site was considered equal to the total amount of modulator (TFA and FA) in  
6 defective UiO-66.

7

8

1

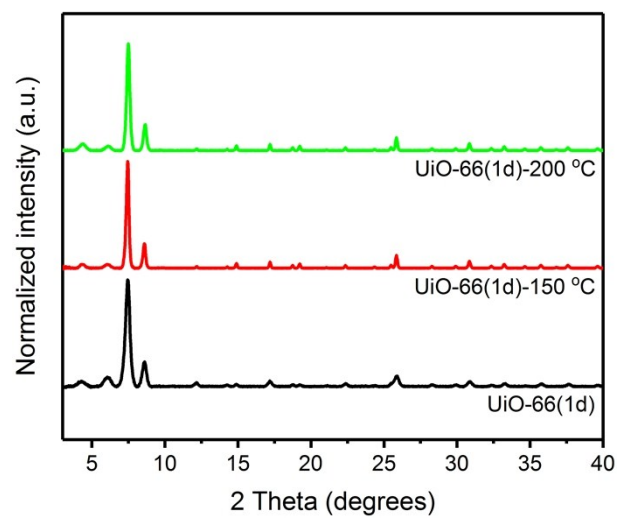

2

3 **Fig. S6** PXRD patterns of UiO-66(1d), UiO-66(1d)-150°C, and UiO-66(1d)-200°C.

4

1

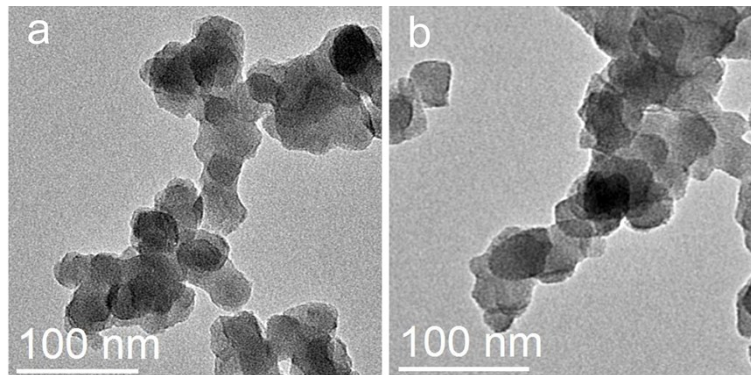

2

3 **Fig. S7** Low-magnitude TEM images of (a) UiO-66(1d)-150°C and (b) UiO-66(1d)-200°C.

1

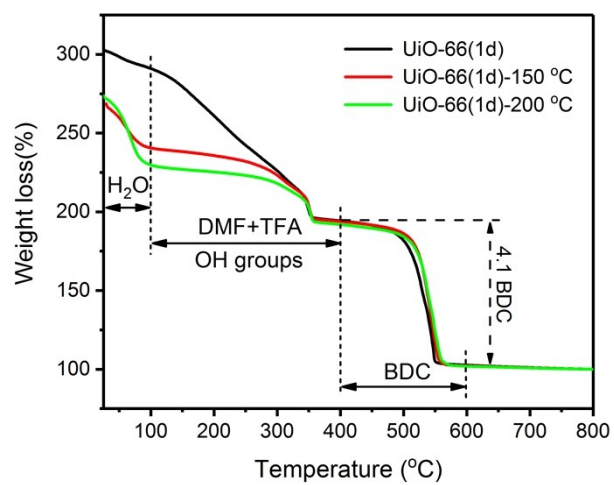

2

3 **Fig. S8** TGA curves of UiO-66(1d), UiO-66(1d)-150°C, and UiO-66(1d)-200°C.

4

1

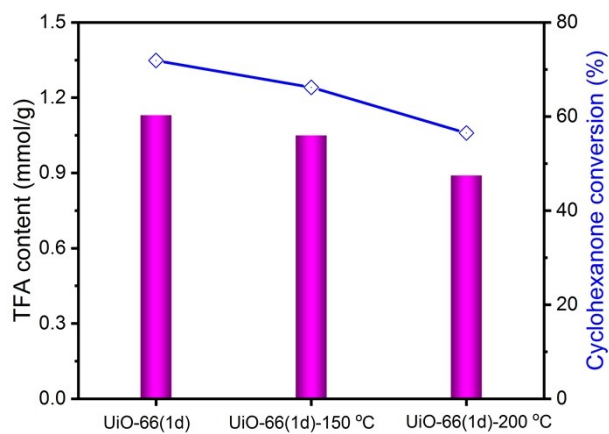

2

3 **Fig. S9** Catalytic performances of UiO-66(1d), UiO-66(1d)-150°C, and UiO-66(1d)-200°C in  
4 cyclohexanone conversion along with their TFA contents after digestion. Reaction conditions: 180 mg of  
5 cyclohexanone, 315 mg of dodecane as internal standard, 550 mg of isopropanol, 15 mg of solid catalyst,  
6 10 mL of toluene, 105 °C for 10 h.

1

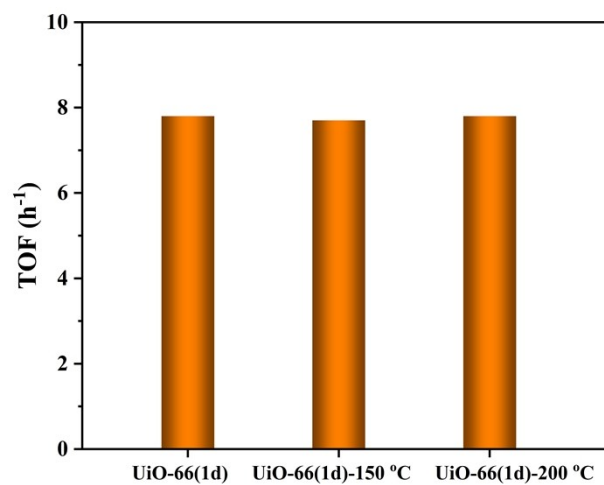

2

3 **Fig. S10** Turnover frequency (TOF) for parent and heated UiO-66 catalysts, where TOF was calculated based  
4 on the number of converted cyclohexanone per open metal site per reaction time and the number of open  
5 metal site was considered equal to the amount of TFA modulator in defective UiO-66.

1

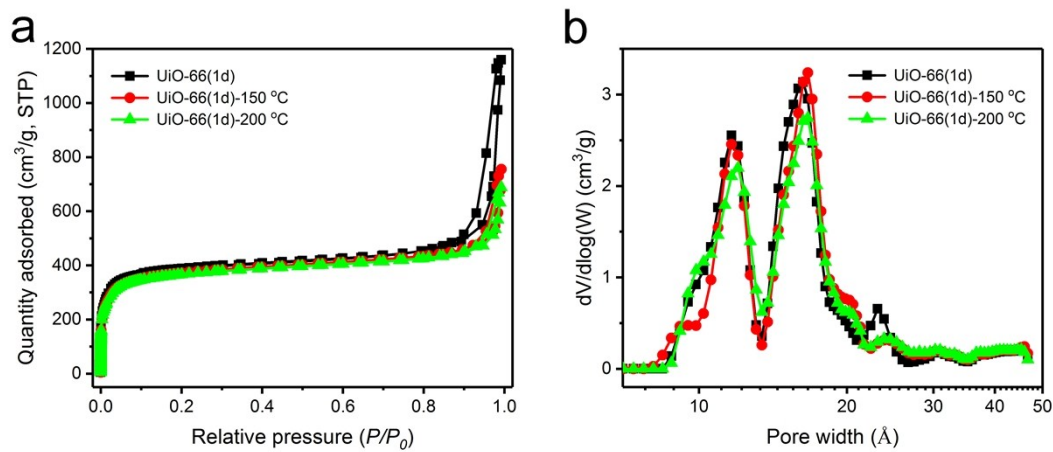

2

3 **Fig. S11** (a) Nitrogen adsorption/desorption isotherms and (b) pore size distribution of UiO-66(1d), UiO-  
 4 66(1d)-150°C, and UiO-66(1d)-200°C.

1

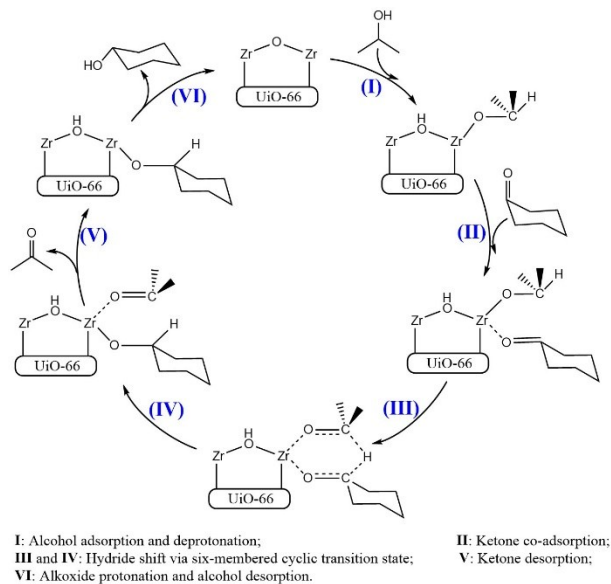

2

3 **Scheme S1** Proposed reaction pathway of cyclohexanone conversion over effective open metal sites in  
 4 defective UiO-66 catalyst. Note: The deprotonized BDC linker and TFA modulator coordinated to Zr metal  
 5 site was omitted and activation of IPA and cyclohexanone was assumed to proceed on the same open metal site.

1

2 **Table S1** BET surface areas and pore volumes of various UiO-66 samples derived from the isotherms.

| Entry | Samples          | BET surface area (m <sup>2</sup> /g) <sup>a</sup> | Total pore volume (cm <sup>3</sup> /g) <sup>b</sup> |
|-------|------------------|---------------------------------------------------|-----------------------------------------------------|
| 1     | UiO-66(1d)       | 1518                                              | 0.71                                                |
| 2     | UiO-66(3d)       | 1694                                              | 0.74                                                |
| 3     | UiO-66-DF        | 1025                                              | 0.39                                                |
| 4     | UiO-66(1d)-H1    | 981                                               | 0.62                                                |
| 5     | UiO-66(1d)-H2    | 953                                               | 0.47                                                |
| 6     | UiO-66(1d)-150°C | 1451                                              | 0.67                                                |
| 7     | UiO-66(1d)-200°C | 1422                                              | 0.66                                                |

<sup>a</sup> Surface area calculated in the  $P/P_0$  range of 0.005 to 0.05. <sup>b</sup> Total pore volume collected at  $P/P_0 = 0.8$ .

3

1

2 **Table S2** Controlling nucleation of UiO-66 in various synthetic conditions.

| Entry | Solvent                         | Temperature (oC) | Crystallinity | UiO-66            |
|-------|---------------------------------|------------------|---------------|-------------------|
| 1     | DMF                             | 80               | Yes           | Yes               |
| 2     | DMF/H <sub>2</sub> O (5:5, V/V) | 80               | Yes           | Yes with impurity |
| 3     | DMF/H <sub>2</sub> O (5:5, V/V) | 60               | Yes           | Yes with impurity |
| 4     | DMF/H <sub>2</sub> O (2:8)      | 80               | Yes           | Yes with impurity |
| 5     | DMF/H <sub>2</sub> O (0.5/9.5)  | 80               | No            | -                 |

3

4

1

2 **Table S3** Conversion of cyclohexanone in the presence of other catalysts.<sup>a</sup>

| Entry | Catalyst                       | TFA content (mmol/g) <sup>b</sup> | Conversion (%) |
|-------|--------------------------------|-----------------------------------|----------------|
| 1     | TFA                            | -                                 | 4.8            |
| 2     | BDC                            | -                                 | 2.6            |
| 3     | UiO-66-DF                      | -                                 | 4.0            |
| 4     | UiO-66(1d)                     | 1.13                              | 71.9           |
| 5     | UiO-66(1d)-H2                  | 0.35                              | 17.9           |
| 6     | UiO-66-DF+TFA <sup>c</sup>     | -                                 | 5.1            |
| 7     | UiO-66-DF+TFA <sup>d</sup>     | -                                 | 9.8            |
| 8     | UiO-66(1d)-H2+TFA <sup>d</sup> | -                                 | 18.3           |
| 9     | UiO-66-DF-T <sup>e</sup>       | 0.11                              | 13.9           |
| 10    | UiO-66(1d)-H2-T <sup>e</sup>   | 0.42                              | 30.6           |

<sup>a</sup> Reaction conditions: 180 mg of cyclohexanone, 315 mg of dodecane as internal standard, 550 mg of isopropanol, 15 mg of solid catalyst, 10 mL of toluene, 105 °C for 10 h. <sup>b</sup> Measured by HPLC after digestion of solid catalyst. <sup>c</sup> 1.93 mg of TFA, which was equal to that in UiO-66(1d), was added as co-catalyst. <sup>d</sup> 19.3 mg of TFA was added as co-catalyst. <sup>e</sup> Solid catalyst was treated with TFA thrice via PSE method.

3

4
